# Supplementary material for: Profiling plasma N-Acylethanolamine levels and their ratios as a biomarker of obesity and dysmetabolism
Source: PubMed Central journal article supplement — Mol Metab. 2018 Jun 6;14:82–94. doi: 10.1016/j.molmet.2018.06.002 (PMC6034062; doi:10.1016/j.molmet.2018.06.002), 2018-06-06
Supplement: mmc1.pdf [file mmc1.pdf]

**Supplemental Table 1.** Anthropometric and metabolic parameters of the female cohort according to the menopausal (MP) status and to body mass index (BMI) classes. Non-italicized data show the mean±SD values of the parameters; italicized data show the P values (sign of the coefficients) of the effects evaluated by means of two-way ANOVA. Significant P values are reported in bold

| Anthropometric and metabolic parameters | Cohort                         | Overall                 | BMI classes             |                         |                         | Effect of BMI <sup>§</sup>          |
|-----------------------------------------|--------------------------------|-------------------------|-------------------------|-------------------------|-------------------------|-------------------------------------|
|                                         |                                |                         | NW                      | OW                      | OB                      | P value                             |
| No. of cases                            | Premenopausal                  | 103 (100%)              | 60 (58.2%)              | 17 (16.5%)              | 26 (25.2%)              | -                                   |
|                                         | Menopausal                     | 81 (100%)               | 29 (35.8%)              | 33 (40.7%)              | 19 (23.5%)              | -                                   |
| Age (years)                             | Premenopausal                  | 39.6±8.0                | 39.0±8.6                | 41.1±6.7                | 39.9±7.5                | <i>0.653 (+)</i>                    |
|                                         | Menopausal                     | 61.7±9.1                | 60.4±8.9                | 62.6±9.4                | 62.3±9.1                | <i>0.436 (+)</i>                    |
|                                         | <i>Effect of MP: P values*</i> | <b>&lt;0.001 (+)</b>    | <b>&lt;0.001 (+)</b>    | <b>&lt;0.001 (+)</b>    | <b>&lt;0.001 (+)</b>    | <i>0.741 (+)<sup>§</sup></i>        |
| BMI (kg/m <sup>2</sup> )                | Premenopausal                  | 26.0±6.1                | 21.8±1.8                | 27.0±1.2                | 35.1±3.7                | <b>&lt;0.001 (+)</b>                |
|                                         | Menopausal                     | 26.9±5.1                | 22.3±1.8                | 26.9±1.3                | 33.9±4.9                | <b>&lt;0.001 (+)</b>                |
|                                         | <i>Effect of MP: P values*</i> | <i>0.996 (+)</i>        | <i>0.136 (+)</i>        | <i>0.921 (-)</i>        | <i>0.311 (-)</i>        | <i>0.089 (-)<sup>§</sup></i>        |
| Waist circumference (cm)                | Premenopausal                  | 86.1±15.2               | 76.5±7.4                | 88.7±9.7                | 106.5±9.5               | <b>&lt;0.001 (+)</b>                |
|                                         | Menopausal                     | 90.0±11.8               | 80.9±8.7                | 89.8±5.7                | 104.1±10.2              | <b>&lt;0.001 (+)</b>                |
|                                         | <i>Effect of MP: P values*</i> | <i>0.287 (+)</i>        | <b><i>0.009 (+)</i></b> | <i>0.566 (+)</i>        | <i>0.404 (-)</i>        | <b><i>0.026 (-)<sup>§</sup></i></b> |
| SBP (mmHg)                              | Premenopausal                  | 120±13                  | 116±10                  | 125±15                  | 127±15                  | <b>&lt;0.001 (+)</b>                |
|                                         | Menopausal                     | 134±19                  | 131±18                  | 132±19                  | 142±20                  | <b><i>0.047 (+)</i></b>             |
|                                         | <i>Effect of MP: P values*</i> | <b>&lt;0.001 (+)</b>    | <b>&lt;0.001 (+)</b>    | <i>0.157 (+)</i>        | <b><i>0.006 (+)</i></b> | <i>0.580 (-)<sup>§</sup></i>        |
| DBP (mmHg)                              | Premenopausal                  | 78±8                    | 76±7                    | 81±7                    | 81±9                    | <b><i>0.014 (+)</i></b>             |
|                                         | Menopausal                     | 82±9                    | 81±7                    | 81±9                    | 87±10                   | <b><i>0.009 (+)</i></b>             |
|                                         | <i>Effect of MP: P values*</i> | <b><i>0.006 (+)</i></b> | <b><i>0.016 (+)</i></b> | <i>0.894 (+)</i>        | <b><i>0.015 (+)</i></b> | <i>0.614 (+)<sup>§</sup></i>        |
| Glucose (mg/dL)                         | Premenopausal                  | 88.6±10.3               | 86.4±8.4                | 89.5±9.5                | 92.9±13.3               | <b><i>0.039 (+)</i></b>             |
|                                         | Menopausal                     | 92.9±14.8               | 90.6±13.5               | 93.8±16.1               | 95.1±14.5               | <i>0.265 (+)</i>                    |
|                                         | <i>Effect of MP: P values*</i> | <i>0.147 (+)</i>        | <i>0.189 (+)</i>        | <i>0.377 (+)</i>        | <i>0.649 (+)</i>        | <i>0.666 (-)<sup>§</sup></i>        |
| Insulin (μU/mL)                         | Premenopausal                  | 7.29±4.21               | 5.53±2.27               | 6.93±2.81               | 11.74±5.29              | <b>&lt;0.001 (+)</b>                |
|                                         | Menopausal                     | 7.88±3.97               | 6.28±2.72               | 7.84±3.81               | 10.38±4.69              | <b>&lt;0.001 (+)</b>                |
|                                         | <i>Effect of MP: P values*</i> | <i>0.446 (+)</i>        | <i>0.128 (+)</i>        | <i>0.341 (+)</i>        | <i>0.390 (-)</i>        | <i>0.111 (-)<sup>§</sup></i>        |
| HOMA-IR                                 | Premenopausal                  | 1.62±1.00               | 1.18±0.54               | 1.56±0.72               | 2.67±1.21               | <b>&lt;0.001 (+)</b>                |
|                                         | Menopausal                     | 1.85±1.12               | 1.45±0.79               | 1.85±1.09               | 2.49±1.34               | <b>&lt;0.001 (+)</b>                |
|                                         | <i>Effect of MP: P values*</i> | <i>0.235 (+)</i>        | <i>0.067 (+)</i>        | <i>0.266 (+)</i>        | <i>0.559 (-)</i>        | <i>0.117 (-)<sup>§</sup></i>        |
| Total cholesterol (mg/dL)               | Premenopausal                  | 182.9±32.4              | 180.8±32.7              | 191.7±36.5              | 181.8±29.2              | <i>0.810 (+)</i>                    |
|                                         | Menopausal                     | 208.7±25.6              | 209.8±29.9              | 208.3±22.3              | 207.5±25.1              | <i>0.850 (-)</i>                    |
|                                         | <i>Effect of MP: P values*</i> | <b>&lt;0.001 (+)</b>    | <b>&lt;0.001 (+)</b>    | <b><i>0.045 (+)</i></b> | <b><i>0.004 (+)</i></b> | <i>0.766 (-)<sup>§</sup></i>        |
| HDL-cholesterol (mg/dL)                 | Premenopausal                  | 59.4±14.2               | 61.9±13.0               | 61.0±9.6                | 52.8±17.5               | <b><i>0.002 (-)</i></b>             |
|                                         | Menopausal                     | 59.8±14.2               | 63.3±11.8               | 59.9±16.3               | 54.1±12.6               | <b><i>0.015 (-)</i></b>             |
|                                         | <i>Effect of MP: P values*</i> | <i>0.820 (+)</i>        | <i>0.592 (+)</i>        | <i>0.605 (-)</i>        | <i>0.637 (+)</i>        | <i>0.955 (+)<sup>§</sup></i>        |
| Triglycerides (mg/dL)                   | Premenopausal                  | 71.1±32.0               | 63.0±21.5               | 73.5±26.7               | 88.3±46.4               | <b><i>0.003 (+)</i></b>             |
|                                         | Menopausal                     | 101.5±46.9              | 87.0±41.9               | 117.2±55.3              | 96.5±28.1               | <i>0.111 (+)</i>                    |
|                                         | <i>Effect of MP: P values*</i> | <b>&lt;0.001 (+)</b>    | <b><i>0.003 (+)</i></b> | <b><i>0.001 (+)</i></b> | <i>0.147 (+)</i>        | <i>0.523 (-)<sup>§</sup></i>        |

NW: normal weight; OW: overweight; OB: obese; MP: menopause; SBP: systolic blood pressure; DBP: diastolic blood pressure; HOMA-IR: homeostatic model assessment – insulin resistance; HDL: high density lipoprotein.

<sup>§</sup> Effect of BMI on anthropometric and metabolic parameters. Positive effect (+): values increased with increasing BMI classes; negative effect (-): values decreased with increasing BMI classes. \* Effect of MP on anthropometric and metabolic parameters. Positive effect (+): higher values in menopausal than in premenopausal females; negative effect (-): lower values in menopausal than in premenopausal females. <sup>§</sup> Interaction between BMI and MP effects on anthropometric and metabolic parameters. Positive interaction (+): the positive (or negative) effect of BMI is higher (or lower) in menopausal than in premenopausal females (i.e., the positive (or negative) effect of MP increased (or decreased) with increasing BMI). Negative interaction (-): the positive (or negative) effect of BMI is lower (or higher) in menopausal than in premenopausal females (i.e., the positive (or negative) effect of MP decreased (or increased) with increasing BMI).
