# Supplementary material for: Profiling plasma N-Acylethanolamine levels and their ratios as a biomarker of obesity and dysmetabolism
Source: PubMed Central journal article supplement — Mol Metab. 2018 Jun 6;14:82–94. doi: 10.1016/j.molmet.2018.06.002 (PMC6034062; doi:10.1016/j.molmet.2018.06.002), 2018-06-06
Supplement: mmc2.pdf [file mmc2.pdf]

**Supplemental Table 2.** Anthropometric and metabolic parameters of the male cohort according to body mass index (BMI) classes. Non-italicized data show the mean±SD values of the parameters; italicized data show the P values (sign of the coefficients) of the effects evaluated by means of two-way ANOVA. Significant P values are reported in bold

| Anthropometric and metabolic parameters | Overall cohort              | BMI classes                 |                             |                         | Effect of BMI <sup>§</sup><br>P value    |
|-----------------------------------------|-----------------------------|-----------------------------|-----------------------------|-------------------------|------------------------------------------|
|                                         |                             | NW                          | OW                          | OB                      |                                          |
| No. of cases                            | 144 (100%)                  | 61 (42.4%)                  | 61 (42.4%)                  | 22 (15.3%)              |                                          |
| Age (years) <sup>†</sup>                | 49.0±14.9                   | 45.2±15.4                   | 50.8±14.5                   | 54.8±12.0               | <b>0.009</b> (+)                         |
| BMI (kg/m <sup>2</sup> )                | 26.3±3.9                    | 23.1±1.5                    | 27.0±1.4                    | 33.3±3.3                | <b>&lt;0.001</b> (+)                     |
| <i>Effect of age: P values*</i>         | <i>0.178</i> (-)            | <b><i>&lt;0.001</i></b> (+) | <i>0.718</i> (-)            | <b><i>0.003</i></b> (-) | <b><i>&lt;0.001</i></b> (-) <sup>§</sup> |
| Waist circumference (cm)                | 94.0±11.7                   | 85.2±8.1                    | 96.7±7.2                    | 111.1±7.0               | <b>&lt;0.001</b> (+)                     |
| <i>Effect of age: P values*</i>         | <i>0.879</i> (+)            | <b><i>&lt;0.001</i></b> (+) | <i>0.228</i> (+)            | <i>0.054</i> (-)        | <b><i>0.002</i></b> (-) <sup>§</sup>     |
| SBP (mmHg)                              | 131±17                      | 126±15                      | 130±14                      | 145±18                  | <b>&lt;0.001</b> (+)                     |
| <i>Effect of age: P values*</i>         | <b><i>&lt;0.001</i></b> (+) | <b><i>&lt;0.001</i></b> (+) | <b><i>&lt;0.001</i></b> (+) | <i>0.268</i> (+)        | <i>0.436</i> (-) <sup>§</sup>            |
| DBP (mmHg)                              | 83±7                        | 80±7                        | 83±6                        | 88±7                    | <b>&lt;0.001</b> (+)                     |
| <i>Effect of age: P values*</i>         | <i>0.371</i> (+)            | <i>0.072</i> (+)            | <b><i>0.029</i></b> (+)     | <i>0.418</i> (-)        | <i>0.140</i> (-) <sup>§</sup>            |
| Glucose (mg/dL)                         | 92.9±11.8                   | 92.1±8.1                    | 92.2±14.2                   | 97.4±12.4               | <i>0.177</i> (+)                         |
| <i>Effect of age: P values*</i>         | <i>0.054</i> (+)            | <i>0.516</i> (-)            | <b><i>0.003</i></b> (+)     | <i>0.253</i> (+)        | <i>0.191</i> (+) <sup>§</sup>            |
| Insulin (μU/mL)                         | 7.95±4.77                   | 6.11±3.37                   | 7.71±3.22                   | 13.75±6.89              | <b>&lt;0.001</b> (+)                     |
| <i>Effect of age: P values*</i>         | <i>0.091</i> (-)            | <i>0.464</i> (-)            | <i>0.592</i> (-)            | <i>0.150</i> (-)        | <i>0.311</i> (-) <sup>§</sup>            |
| HOMA-IR                                 | 1.85±1.20                   | 1.40±0.79                   | 1.77±0.88                   | 3.31±1.74               | <b>&lt;0.001</b> (+)                     |
| <i>Effect of age: P values*</i>         | <i>0.247</i> (-)            | <i>0.405</i> (-)            | <i>0.886</i> (+)            | <i>0.278</i> (-)        | <i>0.518</i> (-) <sup>§</sup>            |
| Total cholesterol (mg/dL)               | 195.2±33.9                  | 187.5±33.2                  | 203.9±33.5                  | 192.9±32.8              | <i>0.648</i> (+)                         |
| <i>Effect of age: P values*</i>         | <i>0.135</i> (+)            | <b><i>&lt;0.001</i></b> (+) | <b><i>0.024</i></b> (+)     | <i>0.403</i> (-)        | <b><i>0.032</i></b> (-) <sup>§</sup>     |
| HDL-cholesterol (mg/dL)                 | 50.2±11.3                   | 52.7±11.0                   | 50.1±10.9                   | 43.3±10.8               | <b>&lt;0.001</b> (-)                     |
| <i>Effect of age: P values*</i>         | <i>0.165</i> (+)            | <i>0.135</i> (+)            | <i>0.051</i> (+)            | <i>0.972</i> (+)        | <i>0.558</i> (-) <sup>§</sup>            |
| Triglycerides (mg/dL)                   | 104.3±57.9                  | 91.8±54.3                   | 105.3±57.8                  | 136.0±57.5              | <b>&lt;0.001</b> (+)                     |
| <i>Effect of age: P values*</i>         | <i>0.542</i> (-)            | <i>0.694</i> (-)            | <i>0.784</i> (+)            | <i>0.492</i> (-)        | <i>0.642</i> (-) <sup>§</sup>            |

NW: normal weight; OW: overweight; OB: obese; SBP: systolic blood pressure; DBP: diastolic blood pressure; HOMA-IR: homeostatic model assessment – insulin resistance; HDL: high density lipoprotein.

<sup>†</sup> One-way ANOVA. <sup>§</sup> Effect of BMI on anthropometric and metabolic parameters. Positive effect (+): values increased with increasing BMI classes; negative effect (-): values decreased with increasing BMI classes. \* Effect of age on anthropometric and metabolic parameters. Positive effect (+): values increased with age; negative effect (-): values decreased with age. <sup>§</sup> Interaction between BMI and age effects on anthropometric and metabolic parameters. Positive interaction (+): the positive (or negative) effect of age increased (or decreased) with BMI (i.e., the positive (or negative) effect of BMI increased (or decreased) with age). Negative interaction (-): the positive (or negative) effect of age decreased (or increased) with BMI (i.e., the positive (or negative) effect of BMI decreased (or increased) with age).
