# Supplementary material for: Profiling plasma N-Acylethanolamine levels and their ratios as a biomarker of obesity and dysmetabolism
Source: PubMed Central journal article supplement — Mol Metab. 2018 Jun 6;14:82–94. doi: 10.1016/j.molmet.2018.06.002 (PMC6034062; doi:10.1016/j.molmet.2018.06.002), 2018-06-06
Supplement: mmc3.pdf [file mmc3.pdf]

**Supplemental Table 3.** Effects of menopause (MP), body mass index (BMI) and of their interaction on N-acyl ethanolamine (NAE) circulating levels and their ratios in the female cohort. Data are shown as P values (sign of the coefficients) of the evaluated effects: non italic data show first order (main) effects; italic data show second order effects (i.e., the interactions between the two main effects). Significant P values are reported in bold

| NAE     | Factors                    | Cohort           | Unadjusted <sup>‡</sup><br>effects | Effects evaluated after adjusting for each metabolic parameter <sup>⊘</sup> |                  |                  |                  |                  |                  |                   |                  |                  |
|---------|----------------------------|------------------|------------------------------------|-----------------------------------------------------------------------------|------------------|------------------|------------------|------------------|------------------|-------------------|------------------|------------------|
|         |                            |                  |                                    | Waist circumference                                                         | SBP              | DBP              | Glucose          | Insulin          | HOMA-IR          | Total cholesterol | HDL-cholesterol  | Triglycerides    |
| AEA     | Effect of MP*              | Overall          | 0.136 (+)                          | 0.391 (-)                                                                   | 0.454 (+)        | 0.065 (+)        | 0.834 (+)        | 0.587 (+)        | 0.240 (+)        | 0.145 (+)         | 0.815 (-)        | 0.091 (-)        |
|         |                            | - NW             | <b>0.021</b> (+)                   | 0.518 (-)                                                                   | 0.939 (-)        | 0.565 (+)        | 0.053 (-)        | 0.462 (+)        | 0.092 (+)        | 0.787 (+)         | 0.309 (-)        | 0.966 (-)        |
|         |                            | - OW             | 0.450 (+)                          | 0.551 (-)                                                                   | 0.196 (+)        | 0.120 (+)        | 0.088 (+)        | 0.928 (-)        | 0.454 (+)        | 0.538 (+)         | 0.613 (-)        | 0.836 (+)        |
|         |                            | - OB             | 0.920 (-)                          | 0.743 (-)                                                                   | 0.955 (+)        | 0.337 (+)        | 0.936 (-)        | 0.663 (+)        | 0.758 (+)        | 0.146 (+)         | 0.214 (+)        | <b>0.018</b> (-) |
|         | Effect of BMI <sup>§</sup> | Pre-menopausal   | <b>&lt;0.001</b> (+)               | 0.823 (-)                                                                   | 0.928 (-)        | 0.330 (-)        | 0.552 (-)        | 0.174 (+)        | <b>0.010</b> (+) | 0.373 (+)         | 0.469 (-)        | <b>0.001</b> (+) |
|         | Menopausal                 | <b>0.004</b> (+) | 0.909 (-)                          | 0.967 (+)                                                                   | 0.725 (-)        | 0.229 (+)        | 0.295 (+)        | 0.056 (+)        | 0.065 (+)        | 0.151 (+)         | 0.557 (-)        |                  |
|         | Int MP x BMI <sup>§</sup>  |                  | <i>0.142</i> (-)                   | <i>0.954</i> (+)                                                            | <i>0.929</i> (+) | <i>0.741</i> (+) | <i>0.206</i> (+) | <i>0.989</i> (+) | <i>0.724</i> (-) | <i>0.282</i> (+)  | <i>0.111</i> (+) | <i>0.037</i> (-) |
| PEA     | Effect of MP*              | Overall          | <b>0.015</b> (+)                   | 0.107 (-)                                                                   | 0.815 (-)        | 0.351 (+)        | 0.992 (-)        | 0.697 (+)        | 0.255 (+)        | 0.537 (-)         | 0.974 (+)        | <b>0.034</b> (-) |
|         |                            | - NW             | <b>0.003</b> (+)                   | 0.554 (-)                                                                   | 0.110 (-)        | 0.683 (-)        | 0.057 (-)        | <b>0.030</b> (+) | <b>0.005</b> (+) | 0.118 (-)         | 0.138 (-)        | 0.665 (-)        |
|         |                            | - OW             | 0.640 (+)                          | 0.090 (-)                                                                   | 0.398 (+)        | 0.164 (+)        | 0.184 (+)        | 0.460 (-)        | 0.931 (+)        | 0.547 (-)         | 0.708 (+)        | 0.488 (-)        |
|         |                            | - OB             | 0.251 (+)                          | 0.671 (-)                                                                   | 0.957 (+)        | 0.699 (+)        | 0.984 (-)        | 0.956 (-)        | 0.825 (+)        | 0.523 (+)         | 0.298 (+)        | <b>0.035</b> (-) |
|         | Effect of BMI <sup>§</sup> | Pre-menopausal   | <b>&lt;0.001</b> (+)               | 0.956 (+)                                                                   | 0.479 (-)        | 0.992 (-)        | 0.565 (-)        | <b>0.029</b> (+) | <b>0.011</b> (+) | 0.577 (+)         | 0.859 (-)        | <b>0.023</b> (+) |
|         | Menopausal                 | 0.074 (+)        | 0.982 (-)                          | 0.499 (+)                                                                   | 0.479 (+)        | 0.210 (+)        | 0.806 (+)        | 0.232 (+)        | <b>0.045</b> (+) | <b>0.043</b> (+)  | 0.519 (-)        |                  |
|         | Int MP x BMI <sup>§</sup>  |                  | <i>0.367</i> (-)                   | <i>0.958</i> (-)                                                            | <i>0.332</i> (+) | <i>0.575</i> (+) | <i>0.198</i> (+) | <i>0.260</i> (-) | <i>0.388</i> (-) | <i>0.167</i> (+)  | <i>0.075</i> (+) | <i>0.094</i> (-) |
| OEA     | Effect of MP*              | Overall          | <b>0.027</b> (+)                   | 0.321 (-)                                                                   | 0.539 (+)        | 0.462 (+)        | 0.548 (+)        | 0.346 (+)        | 0.111 (+)        | 0.872 (-)         | 0.553 (-)        | 0.208 (-)        |
|         |                            | - NW             | <b>0.021</b> (+)                   | 0.263 (-)                                                                   | 0.092 (-)        | 0.441 (-)        | 0.173 (-)        | <b>0.041</b> (+) | <b>0.028</b> (+) | <b>0.028</b> (-)  | 0.102 (-)        | 0.475 (-)        |
|         |                            | - OW             | 0.276 (+)                          | 0.793 (-)                                                                   | 0.109 (+)        | 0.396 (+)        | 0.114 (+)        | 0.808 (-)        | 0.390 (+)        | 0.961 (+)         | 0.858 (-)        | 0.921 (-)        |
|         |                            | - OB             | 0.462 (+)                          | 0.559 (-)                                                                   | 0.468 (+)        | 0.316 (+)        | 0.763 (+)        | 0.699 (+)        | 0.578 (+)        | 0.255 (+)         | 0.473 (+)        | 0.216 (-)        |
|         | Effect of BMI <sup>§</sup> | Pre-menopausal   | <b>0.012</b> (+)                   | 0.767 (-)                                                                   | 0.484 (-)        | 0.758 (-)        | 0.564 (-)        | 0.310 (+)        | 0.196 (+)        | 0.698 (+)         | 0.544 (-)        | 0.058 (+)        |
|         | Menopausal                 | 0.308 (+)        | 0.886 (-)                          | 0.147 (+)                                                                   | 0.173 (+)        | 0.293 (+)        | 0.933 (-)        | 0.450 (+)        | <b>0.005</b> (+) | 0.110 (+)         | 0.844 (+)        |                  |
|         | Int MP x BMI <sup>§</sup>  |                  | <i>0.428</i> (-)                   | <i>0.933</i> (+)                                                            | <i>0.118</i> (+) | <i>0.208</i> (+) | <i>0.253</i> (+) | <i>0.496</i> (-) | <i>0.749</i> (-) | <i>0.032</i> (+)  | <i>0.097</i> (+) | <i>0.441</i> (-) |
| PEA/AEA | Effect of MP*              | Overall          | 0.554 (+)                          | 0.490 (-)                                                                   | 0.172 (-)        | 0.082 (-)        | 0.732 (-)        | 0.620 (-)        | 0.580 (-)        | <b>0.002</b> (-)  | 0.695 (+)        | 0.855 (+)        |
|         |                            | - NW             | 0.960 (-)                          | 0.775 (+)                                                                   | 0.099 (-)        | 0.200 (-)        | 0.456 (+)        | 0.161 (+)        | 0.478 (+)        | <b>0.034</b> (-)  | 0.971 (-)        | 0.686 (-)        |
|         |                            | - OW             | 0.552 (-)                          | 0.276 (-)                                                                   | 0.302 (-)        | 0.458 (-)        | 0.254 (-)        | 0.442 (-)        | 0.275 (-)        | 0.073 (-)         | 0.239 (+)        | 0.276 (-)        |
|         |                            | - OB             | 0.118 (+)                          | 0.887 (-)                                                                   | 0.988 (+)        | 0.275 (-)        | 0.856 (+)        | 0.394 (-)        | 0.776 (-)        | 0.089 (-)         | 0.426 (-)        | 0.219 (+)        |
|         | Effect of BMI <sup>§</sup> | Pre-menopausal   | <b>&lt;0.001</b> (-)               | 0.511 (+)                                                                   | 0.554 (-)        | 0.087 (+)        | 0.837 (+)        | 0.486 (+)        | 0.365 (-)        | 0.375 (-)         | 0.381 (+)        | <b>0.021</b> (-) |
|         | Menopausal                 | <b>0.015</b> (-) | 0.838 (+)                          | 0.443 (+)                                                                   | 0.157 (+)        | 0.743 (-)        | 0.204 (-)        | 0.122 (-)        | 0.367 (-)        | 0.954 (-)         | 0.875 (+)        |                  |
|         | Int MP x BMI <sup>§</sup>  |                  | <i>0.199</i> (+)                   | <i>0.787</i> (-)                                                            | <i>0.333</i> (+) | <i>0.964</i> (+) | <i>0.707</i> (-) | <i>0.152</i> (-) | <i>0.595</i> (-) | <i>0.782</i> (-)  | <i>0.591</i> (-) | <i>0.202</i> (+) |
| OEA/AEA | Effect of MP*              | Overall          | 0.163 (+)                          | 0.840 (-)                                                                   | 0.931 (-)        | 0.165 (-)        | 0.946 (+)        | 0.656 (+)        | 0.576 (+)        | <b>0.017</b> (-)  | 0.561 (-)        | 0.562 (+)        |
|         |                            | - NW             | 0.684 (-)                          | 0.611 (-)                                                                   | 0.061 (-)        | 0.107 (-)        | 0.449 (+)        | 0.087 (+)        | 0.700 (+)        | <b>0.002</b> (-)  | 0.340 (-)        | 0.443 (-)        |
|         |                            | - OW             | 0.657 (+)                          | 0.459 (+)                                                                   | 0.844 (+)        | 0.261 (-)        | 0.694 (-)        | 0.737 (-)        | 0.935 (+)        | 0.245 (-)         | 0.716 (+)        | 0.660 (-)        |
|         |                            | - OB             | <b>0.038</b> (+)                   | 0.457 (-)                                                                   | 0.303 (+)        | 0.771 (+)        | 0.961 (-)        | 0.956 (-)        | 0.622 (+)        | 0.595 (-)         | 0.500 (-)        | 0.139 (+)        |
|         | Effect of BMI <sup>§</sup> | Pre-menopausal   | <b>&lt;0.001</b> (-)               | 0.428 (+)                                                                   | 0.495 (-)        | 0.260 (+)        | 0.466 (+)        | 0.829 (-)        | 0.060 (-)        | 0.110 (-)         | 0.641 (-)        | 0.182 (-)        |
|         | Menopausal                 | <b>0.012</b> (-) | 0.848 (+)                          | 0.054 (+)                                                                   | <b>0.011</b> (+) | 0.974 (-)        | 0.198 (-)        | 0.190 (-)        | 0.646 (+)        | 0.937 (-)         | 0.247 (+)        |                  |
|         | Int MP x BMI <sup>§</sup>  |                  | <i>0.056</i> (+)                   | <i>0.711</i> (-)                                                            | <i>0.055</i> (+) | <i>0.196</i> (+) | <i>0.583</i> (-) | <i>0.369</i> (-) | <i>0.756</i> (+) | <i>0.208</i> (+)  | <i>0.844</i> (+) | <i>0.096</i> (+) |
| OEA/PEA | Effect of MP*              | Overall          | 0.416 (+)                          | 0.680 (+)                                                                   | 0.137 (+)        | 0.924 (+)        | 0.316 (+)        | 0.208 (+)        | 0.155 (+)        | 0.571 (+)         | 0.268 (-)        | 0.566 (+)        |
|         |                            | - NW             | 0.887 (-)                          | 0.217 (-)                                                                   | 0.382 (-)        | 0.350 (-)        | 0.820 (+)        | 0.488 (+)        | 0.993 (+)        | 0.053 (-)         | 0.316 (-)        | 0.389 (-)        |
|         |                            | - OW             | 0.160 (+)                          | <b>0.049</b> (+)                                                            | 0.080 (+)        | 0.675 (-)        | 0.289 (+)        | 0.494 (+)        | 0.114 (+)        | 0.381 (+)         | 0.393 (-)        | 0.421 (+)        |
|         |                            | - OB             | 0.990 (+)                          | 0.550 (-)                                                                   | 0.182 (+)        | 0.133 (+)        | 0.771 (+)        | 0.407 (+)        | 0.441 (+)        | 0.194 (+)         | 0.991 (-)        | 0.522 (+)        |
|         | Effect of BMI <sup>§</sup> | Pre-menopausal   | 0.257 (-)                          | 0.620 (-)                                                                   | 0.734 (-)        | 0.417 (-)        | 0.934 (+)        | 0.192 (-)        | 0.159 (-)        | 0.697 (-)         | 0.300 (-)        | 0.632 (+)        |
|         | Menopausal                 | 0.427 (-)        | 0.803 (-)                          | 0.075 (+)                                                                   | 0.115 (+)        | 0.862 (+)        | 0.605 (-)        | 0.740 (-)        | <b>0.022</b> (+) | 0.886 (+)         | 0.168 (+)        |                  |
|         | Int MP x BMI <sup>§</sup>  |                  | <i>0.924</i> (+)                   | <i>0.894</i> (+)                                                            | <i>0.112</i> (+) | <i>0.082</i> (+) | <i>0.952</i> (+) | <i>0.706</i> (+) | <i>0.477</i> (+) | <i>0.033</i> (+)  | <i>0.484</i> (+) | <i>0.335</i> (+) |

SBP: systolic blood pressure; DBP: diastolic blood pressure; HOMA-IR: homeostatic model assessment – insulin resistance; HDL: high density lipoprotein; AEA: N-arachidonoyl ethanolamide; PEA: N-palmitoyl ethanolamide; OEA: N-oleoyl ethanolamide; NW: normal weight; OW: overweight; OB: obese; Int.: interaction. <sup>‡</sup> Two-way ANOVA (analysis unadjusted for the metabolic parameters). <sup>⊘</sup> Two-way ANCOVA (metabolic parameters introduced as covariates). <sup>§</sup> Effect of BMI on NAE levels and ratios. Positive effect (+): NAE values increased with increasing BMI classes. Negative effect (-): NAE values decreased with increasing BMI classes. \* Effect of MP on NAE levels and ratios. Positive effect (+): higher NAE values in menopausal than in premenopausal females; negative effect (-): lower NAE values in menopausal than in premenopausal females. <sup>§</sup> Interaction between BMI and MP effects on NAE levels and ratios. Positive interaction (+): the positive (or negative) effect of BMI on NAE values is higher (or lower) in menopausal than in premenopausal females (i.e.: the positive (or negative) effect of MP on NAE values increased (or decreased) with increasing BMI classes). Negative interaction (-): the positive (or negative) effect of BMI on NAE values is lower (or higher) in menopausal than in premenopausal females (i.e.: the positive (or negative) effect of MP on NAE values decreased (or increased) with increasing BMI classes).
