# Supplementary material for: Profiling plasma N-Acylethanolamine levels and their ratios as a biomarker of obesity and dysmetabolism
Source: PubMed Central journal article supplement — Mol Metab. 2018 Jun 6;14:82–94. doi: 10.1016/j.molmet.2018.06.002 (PMC6034062; doi:10.1016/j.molmet.2018.06.002), 2018-06-06
Supplement: mmc4.pdf [file mmc4.pdf]

**Supplemental Table 4.** Effects of body mass index (BMI), age and of their interaction on N-acylethanolamine (NAE) circulating levels and their ratios in the male cohort. Data are shown as P values (sign of the coefficients) of the evaluated effects: non italic data show first order (main) effects; italic data show second order effects (i.e., the interactions between the two main effects). Significant P values are reported in bold

| NAE                               | Factors                    | Cohort           | Unadjusted effects <sup>‡</sup> | Effects evaluated after adjusting for each metabolic parameter <sup>∞</sup> |                  |                         |                    |                  |                  |                         |                  |                  |
|-----------------------------------|----------------------------|------------------|---------------------------------|-----------------------------------------------------------------------------|------------------|-------------------------|--------------------|------------------|------------------|-------------------------|------------------|------------------|
|                                   |                            |                  |                                 | Waist circumference                                                         | SBP              | DBP                     | Glucose            | Insulin          | HOMA-IR          | Total Cholesterol       | HDL-cholesterol  | Triglycerides    |
| AEA                               | Effect of BMI <sup>§</sup> | Overall          | < <b>0.001</b> (+)              | 0.942 (+)                                                                   | 0.069 (+)        | 0.527 (+)               | <b>0.032</b> (+)   | 0.489 (+)        | 0.068 (+)        | 0.546 (+)               | 0.705 (+)        | 0.176 (+)        |
|                                   | Effect of age <sup>*</sup> | Overall          | 0.474 (-)                       | 0.472 (+)                                                                   | 0.054 (-)        | 0.960 (-)               | <b>0.004</b> (-)   | 0.413 (+)        | 0.641 (-)        | 0.581 (+)               | 0.157 (-)        | 0.284 (-)        |
|                                   |                            | - NW             | 0.987 (+)                       | 0.452 (-)                                                                   | 0.323 (-)        | 0.113 (+)               | 0.776 (-)          | 0.071 (+)        | 0.809 (+)        | 0.082 (-)               | 0.877 (+)        | 0.909 (-)        |
|                                   |                            | - OW             | 0.725 (-)                       | 0.997 (-)                                                                   | 0.250 (-)        | 0.819 (-)               | 0.674 (-)          | 0.552 (+)        | 0.850 (+)        | 0.957 (-)               | 0.917 (-)        | 0.200 (-)        |
|                                   |                            | - OB             | 0.487 (-)                       | 0.355 (+)                                                                   | 0.201 (-)        | 0.636 (-)               | <b>0.003</b> (-)   | 0.892 (+)        | 0.565 (-)        | 0.261 (+)               | 0.096 (-)        | 0.463 (-)        |
| <i>Int. BMI x age<sup>§</sup></i> |                            | <i>0.522</i> (-) | <i>0.286</i> (+)                | <i>0.471</i> (-)                                                            | <i>0.340</i> (-) | <i><b>0.008</b></i> (-) | <i>0.695</i> (-)   | <i>0.544</i> (-) | <i>0.121</i> (+) | <i>0.111</i> (-)        | <i>0.512</i> (-) |                  |
| PEA                               | Effect of BMI <sup>§</sup> | Overall          | < <b>0.001</b> (+)              | 0.705 (+)                                                                   | 0.303 (+)        | 0.936 (-)               | <b>0.007</b> (+)   | 0.761 (+)        | 0.221 (+)        | 0.731 (+)               | 0.671 (+)        | 0.546 (+)        |
|                                   | Effect of age <sup>*</sup> | Overall          | 0.657 (-)                       | 0.572 (+)                                                                   | 0.106 (-)        | 0.127 (+)               | <b>0.002</b> (-)   | 0.124 (+)        | 0.856 (+)        | 0.290 (+)               | 0.188 (-)        | 0.690 (+)        |
|                                   |                            | - NW             | 0.372 (+)                       | 0.733 (-)                                                                   | 0.228 (-)        | <b>0.002</b> (+)        | 0.303 (+)          | 0.057 (+)        | 0.247 (+)        | 0.267 (-)               | 0.093 (+)        | 0.379 (+)        |
|                                   |                            | - OW             | 0.828 (-)                       | 0.250 (+)                                                                   | 0.600 (+)        | 0.188 (+)               | 0.965 (-)          | 0.178 (+)        | 0.378 (+)        | 0.183 (+)               | 0.651 (-)        | 0.786 (+)        |
|                                   |                            | - OB             | 0.406 (-)                       | 0.680 (+)                                                                   | 0.084 (-)        | 0.961 (+)               | < <b>0.001</b> (-) | 0.537 (+)        | 0.818 (-)        | 0.334 (+)               | <b>0.039</b> (-) | 0.964 (+)        |
| <i>Int. BMI x age<sup>§</sup></i> |                            | <i>0.261</i> (-) | <i>0.633</i> (+)                | <i>0.300</i> (-)                                                            | <i>0.336</i> (-) | <i>&lt;0.001</i> (-)    | <i>0.968</i> (+)   | <i>0.677</i> (-) | <i>0.219</i> (+) | <i><b>0.011</b></i> (-) | <i>0.803</i> (-) |                  |
| OEA                               | Effect of BMI <sup>§</sup> | Overall          | <b>0.022</b> (+)                | 0.759 (+)                                                                   | 0.148 (+)        | 0.635 (+)               | 0.099 (+)          | 0.931 (-)        | 0.262 (+)        | 0.413 (+)               | 0.498 (+)        | 0.784 (+)        |
|                                   | Effect of age <sup>*</sup> | Overall          | 0.340 (+)                       | 0.571 (+)                                                                   | 0.119 (-)        | 0.362 (+)               | 0.073 (-)          | <b>0.044</b> (+) | 0.444 (+)        | 0.404 (+)               | 0.093 (-)        | 0.678 (+)        |
|                                   |                            | - NW             | 0.969 (+)                       | 0.797 (+)                                                                   | 0.149 (-)        | <b>0.022</b> (+)        | 0.360 (+)          | <b>0.007</b> (+) | 0.819 (+)        | 0.064 (-)               | 0.602 (-)        | 0.093 (+)        |
|                                   |                            | - OW             | 0.109 (+)                       | 0.135 (+)                                                                   | 0.978 (+)        | 0.601 (+)               | 0.443 (+)          | 0.052 (+)        | <b>0.016</b> (+) | 0.467 (+)               | 0.098 (-)        | 0.646 (+)        |
|                                   |                            | - OB             | 0.728 (+)                       | 0.839 (+)                                                                   | 0.207 (-)        | 0.978 (+)               | <b>0.013</b> (-)   | 0.502 (+)        | 0.888 (+)        | 0.245 (+)               | 0.289 (+)        | 0.779 (-)        |
| <i>Int. BMI x age<sup>§</sup></i> |                            | <i>0.763</i> (+) | <i>0.888</i> (+)                | <i>0.614</i> (-)                                                            | <i>0.480</i> (-) | <i><b>0.008</b></i> (-) | <i>0.881</i> (-)   | <i>0.919</i> (+) | <i>0.106</i> (+) | <i>0.441</i> (-)        | <i>0.410</i> (-) |                  |
| PEA/AEA                           | Effect of BMI <sup>§</sup> | Overall          | <b>0.032</b> (-)                | 0.700 (+)                                                                   | 0.114 (-)        | 0.253 (-)               | 0.893 (+)          | 0.492 (-)        | 0.198 (-)        | 0.579 (-)               | 0.925 (-)        | 0.182 (-)        |
|                                   | Effect of age <sup>*</sup> | Overall          | 0.589 (+)                       | 0.703 (-)                                                                   | 0.341 (+)        | <b>0.033</b> (+)        | 0.572 (+)          | 0.436 (+)        | 0.307 (+)        | 0.555 (+)               | 0.580 (+)        | <b>0.020</b> (+) |
|                                   |                            | - NW             | 0.244 (+)                       | 0.429 (+)                                                                   | 0.978 (-)        | 0.110 (+)               | 0.079 (+)          | 0.750 (-)        | 0.249 (+)        | 0.151 (+)               | <b>0.037</b> (+) | 0.161 (+)        |
|                                   |                            | - OW             | 0.823 (+)                       | 0.135 (+)                                                                   | <b>0.012</b> (+) | <b>0.032</b> (+)        | 0.551 (+)          | 0.409 (+)        | 0.405 (+)        | <b>0.045</b> (+)        | 0.689 (-)        | <b>0.016</b> (+) |
|                                   |                            | - OB             | 0.990 (+)                       | 0.362 (-)                                                                   | 0.805 (-)        | 0.392 (+)               | 0.852 (-)          | 0.521 (+)        | 0.507 (+)        | 0.590 (-)               | 0.925 (-)        | 0.187 (+)        |
| <i>Int. BMI x age<sup>§</sup></i> |                            | <i>0.639</i> (-) | <i>0.288</i> (-)                | <i>0.834</i> (-)                                                            | <i>0.762</i> (+) | <i>0.430</i> (-)        | <i>0.480</i> (+)   | <i>0.641</i> (+) | <i>0.364</i> (-) | <i>0.361</i> (-)        | <i>0.434</i> (+) |                  |
| OEA/AEA                           | Effect of BMI <sup>§</sup> | Overall          | <b>0.017</b> (-)                | 0.629 (+)                                                                   | 0.762 (-)        | 0.897 (-)               | 0.653 (-)          | 0.269 (-)        | 0.329 (-)        | 0.598 (+)               | 0.628 (+)        | 0.175 (-)        |
|                                   | Effect of age <sup>*</sup> | Overall          | <b>0.014</b> (+)                | 0.833 (-)                                                                   | 0.833 (+)        | 0.141 (+)               | 0.278 (+)          | 0.067 (+)        | 0.066 (+)        | 0.679 (+)               | 0.542 (-)        | <b>0.041</b> (+) |
|                                   |                            | - NW             | 0.920 (-)                       | 0.139 (+)                                                                   | 0.371 (-)        | 0.171 (+)               | 0.106 (+)          | 0.174 (+)        | 0.868 (-)        | 0.648 (-)               | 0.283 (-)        | <b>0.007</b> (+) |
|                                   |                            | - OW             | <b>0.006</b> (+)                | <b>0.045</b> (+)                                                            | 0.129 (+)        | 0.344 (+)               | 0.134 (+)          | 0.076 (+)        | <b>0.003</b> (+) | 0.311 (+)               | <b>0.024</b> (-) | <b>0.042</b> (+) |
|                                   |                            | - OB             | 0.097 (+)                       | 0.315 (-)                                                                   | 0.867 (-)        | 0.435 (+)               | 0.837 (+)          | 0.343 (+)        | 0.241 (+)        | 0.848 (+)               | 0.498 (+)        | 0.505 (+)        |
| <i>Int. BMI x age<sup>§</sup></i> |                            | <i>0.121</i> (+) | <i>0.192</i> (-)                | <i>0.810</i> (+)                                                            | <i>0.761</i> (+) | <i>0.710</i> (-)        | <i>0.605</i> (+)   | <i>0.236</i> (+) | <i>0.758</i> (+) | <i>0.296</i> (+)        | <i>0.787</i> (-) |                  |
| OEA/PEA                           | Effect of BMI <sup>§</sup> | Overall          | 0.561 (-)                       | 0.972 (-)                                                                   | 0.272 (+)        | 0.349 (+)               | 0.590 (-)          | 0.616 (-)        | 0.802 (+)        | 0.397 (+)               | 0.488 (+)        | 0.743 (-)        |
|                                   | Effect of age <sup>*</sup> | Overall          | <b>0.039</b> (+)                | 0.789 (+)                                                                   | 0.607 (-)        | 0.654 (-)               | 0.504 (+)          | 0.188 (+)        | 0.323 (+)        | 0.948 (+)               | 0.195 (-)        | 0.914 (+)        |
|                                   |                            | - NW             | 0.288 (-)                       | 0.451 (+)                                                                   | 0.443 (-)        | 0.811 (-)               | 0.781 (+)          | <b>0.049</b> (+) | 0.249 (-)        | 0.095 (-)               | <b>0.002</b> (-) | 0.123 (+)        |
|                                   |                            | - OW             | <b>0.006</b> (+)                | 0.323 (+)                                                                   | 0.605 (-)        | 0.407 (-)               | 0.213 (+)          | 0.171 (+)        | <b>0.007</b> (+) | 0.583 (-)               | <b>0.027</b> (-) | 0.725 (+)        |
|                                   |                            | - OB             | 0.107 (+)                       | 0.913 (-)                                                                   | 0.981 (+)        | 0.991 (-)               | 0.756 (+)          | 0.735 (+)        | 0.599 (+)        | 0.449 (+)               | 0.463 (+)        | 0.591 (-)        |
| <i>Int. BMI x age<sup>§</sup></i> |                            | <i>0.057</i> (+) | <i>0.784</i> (-)                | <i>0.721</i> (+)                                                            | <i>0.948</i> (+) | <i>0.846</i> (+)        | <i>0.805</i> (-)   | <i>0.479</i> (+) | <i>0.237</i> (+) | <i>0.059</i> (+)        | <i>0.308</i> (-) |                  |

SBP: systolic blood pressure; DBP: diastolic blood pressure; HOMA-IR: homeostatic model assessment – insulin resistance; HDL: high density lipoprotein; AEA: N-arachidonylethanolamide; PEA: N-palmitoylethanolamide; OEA: N-oleoylethanolamide; NW: normal weight; OW: overweight; OB: obese; Int.: interaction.

<sup>‡</sup> Two-way ANOVA (analysis unadjusted for the metabolic parameters). <sup>∞</sup> Two-way ANCOVA (metabolic parameters introduced as covariates). <sup>§</sup> Effect of BMI on NAE levels and ratios. Positive effect (+): NAE values increased with increasing BMI classes; negative effect (-): NAE values decreased with increasing BMI classes. \* Effect of age on NAE levels and ratios. Positive effect (+): NAE values increased with age; negative effect (-): NAE values decreased with age. <sup>§</sup> Interaction between BMI and age effects on NAE levels and ratios. Positive interaction (+): the positive (or negative) effect of age on NAE values increased (or decreased) with increasing BMI classes (i.e., the positive (or negative) effect of BMI increased (or decreased) with increasing age). Negative interaction (-): the positive (or negative) effect of age decreased (or increased) with increasing BMI classes (i.e., the positive (or negative) effect of BMI decreased (or increased) with increasing age).
